# Supplementary material for: Improved Survival with Vemurafenib in Melanoma with BRAF V600E Mutation
Source: Atypon-hosted journal article supplement (doi:10.1056/nejmoa1103782), 2011-06-05
Supplement: nejmoa1103782_appendix.pdf [file nejmoa1103782_appendix.pdf]

## Supplementary Appendix

This appendix has been provided by the authors to give readers additional information about their work.

Supplement to: Chapman PB, Hauschild A, Robert C, et al. Improved survival with vemurafenib in melanoma with BRAF V600E mutation. *N Engl J Med* 2011;364:2507-16. DOI: 10.1056/NEJMoa1103782.

## Online Supplement

The following investigators and sponsor members contributed to the study (listed in alphabetical order by Country): Australia: F. Boyle (North Sydney), B. Brady (Malvern), M. Eastgate (Herston), A. Guminski (St. Leonards), R. Kefford (Westmead), M. Millward (Nedlands), P. Parente (Box Hill), M. Wu (Frankston), V. Atkinson (Woolloongabba), P. Hersey (Waratah); Canada: F. Couture (Quebec), E. McWhirter (Hamilton), W. Miller (Montreal), T. Petrella (Toronto), M. Smylie (Edmonton), R. Wong (Winnipeg); France: D. Cupissol (Montpellier), J-J. Grob (Marseille), P. Joly (Rouen), L. Mortier (Lille), J-P. Ortonne (Nice), L. Thomas (Pierre Benite); Germany : C. Berking (Muenchen), A. Enk (Heidelberg), A. Gesierich (Würzburg), R. Gutzmer (Hannover), C. Hafner (Regensburg), R. Herbst (Erfurt), R. Kaufmann (Frankfurt), C. Loquai (Mainz), C. Mauch (Koeln), P. Mohr (Buxtehude), S. Sell (Jena), J. Simon (Leipzig), R. Stadler (Minden), A. Stein (Dresden); Israel: M. Lotem (Jerusalem), I. Ron (Tel Aviv), J. Schachter (Tel Hashomer Ramat Gan); Italy: F. Cognetti (Rome), M. Del Vecchio (Milano), M. Guida (Bari), P. Queirolo (Genova), S. Siena (Milano); Netherlands: G. Hospers (Groningen), A. van den Eertwegh (Amsterdam); New Zealand: C. Barrow (Wellington), R. Isaacs (Palmerston North), C. Jackson (Dunedin), M. Jameson (Hamilton), M. McCrystal (Auckland); Sweden: J. Hansson (Stockholm), L. Lundgren (Lund), I. Ljuslinder (Umeå), G. Wagenius (Uppsala), T. Walz (Linköping); Switzerland: O. Micheli (Lausanne); United Kingdom: E. Brown (Edinburgh), D. Chao (London), P. Corrie (Cambridge), J. Evans (Glasgow), M. Harries (London), M. Middleton (Oxford), P. Nathan (Northwood), C. Ottensmeier (Southampton), P. Patel (Nottingham), R. Plummer (Newcastle upon Tyne), J. Wagstaff (Swansea), V. Wolstenholme (London); USA: W. Akerley (Salt Lake City, UT.), F. Collichio (Chapel Hill, NC.), R. Conry (Birmingham, AL.), L. Cranmer (Tucson, AZ.), B. Curti (Portland, OR.), L. Flaherty (Detroit, MI.), J. Hainsworth (Nashville, TN.), D. Lawson (Atlanta, GA.), G.

Linette (St. Louis, MO.), T. Logan (Indianapolis, IN.), K. Margolin (Seattle, WA.), A. Pavlick (New York, NY.), L. Spitler (San Francisco, CA.), R. Gonzalez (Aurora, CO.), T. Hutson (Dallas, TX.), S. Moschos (Pittsburgh, PA.), L. Schuchter ( Philadelphia, PA.); Genentech : Beth Helms; F. Hoffmann-La Roche Ltd: Frederic Bossierre, Susan Cheng, Vidya Deo, Shurree Harrison, Andrew Joe, Astrid Kohler, Vera Kucera, Jeffrey Lawrence, Axel Muehlig, Sandrine Nanni, Jeana Parmi, Mark Rothe, Kirill Tchernakov, and Kerstin Trunzer; Plexxikon: Gideon Bollag.

Supplementary Table A. **Adverse Events of Any Grade Reported in At Least 5% of Patients in Either Treatment Arm.\***

| <b>Event, number of patients (percent)</b> | <b>Vemurafenib<br/>(N=336<sup>†</sup>)</b> | <b>Dacarbazine<br/>(N=282)</b> |
|--------------------------------------------|--------------------------------------------|--------------------------------|
| Arthralgia                                 | 165 (49)                                   | 9 (3)                          |
| Rash                                       | 121 (36)                                   | 3 (1)                          |
| Alopecia                                   | 117 (35)                                   | 6 (2)                          |
| Fatigue                                    | 112 (33)                                   | 87 (31)                        |
| Nausea                                     | 101 (30)                                   | 115 (41)                       |
| Photosensitivity reaction                  | 101 (30)                                   | 10 (4)                         |
| Diarrhea                                   | 84 (25)                                    | 34 (12)                        |
| Pruritis                                   | 74 (22)                                    | 4 (1)                          |
| Headache                                   | 72 (21)                                    | 26 (9)                         |
| Hyperkeratosis                             | 67 (20)                                    | 0                              |
| Skin papilloma                             | 62 (18)                                    | 0                              |
| Pyrexia                                    | 59 (18)                                    | 25 (9)                         |
| Dry skin                                   | 54 (16)                                    | 3 (1)                          |
| Decreased appetite                         | 53 (16)                                    | 20 (7)                         |
| Vomiting                                   | 50 (15)                                    | 67 (24)                        |

|                                               |         |         |
|-----------------------------------------------|---------|---------|
| Edema peripheral                              | 50 (15) | 13 (5)  |
| Pain in extremity                             | 45 (13) | 17 (6)  |
| Dysgeusia                                     | 44 (13) | 9 (3)   |
| Squamous cell carcinoma of the skin           | 40 (12) | 1 (<1)  |
| Myalgia                                       | 39 (12) | 4 (1)   |
| Erythema                                      | 38 (11) | 4 (1)   |
| Constipation                                  | 32 (10) | 65 (23) |
| Sunburn                                       | 31 (9)  | 0       |
| Rash maculo-papular                           | 29 (9)  | 1 (<1)  |
| Asthenia                                      | 28 (8)  | 22 (8)  |
| Keratoacanthoma                               | 27 (8)  | 0       |
| Blood alkaline phosphatase increased          | 25 (7)  | 0       |
| Seborrhoeic keratosis                         | 24 (7)  | 3 (1)   |
| Cough                                         | 23 (7)  | 16 (6)  |
| Abdominal pain upper                          | 23 (7)  | 5 (2)   |
| Pain                                          | 22 (7)  | 14 (5)  |
| Palmar-plantar erythrodysesthesia<br>syndrome | 22 (7)  | 1 (<1)  |
| Actinic keratosis                             | 21 (6)  | 9 (3)   |
| Musculoskeletal pain                          | 21 (6)  | 9 (3)   |
| Skin lesion                                   | 21 (6)  | 1 (<1)  |

|                  |        |         |
|------------------|--------|---------|
| Back pain        | 20 (6) | 13 (5)  |
| Dizziness        | 20 (6) | 10 (4)  |
| Weight decreased | 20 (6) | 6 (2)   |
| Dyspnea          | 19 (6) | 20 (7)  |
| Insomnia         | 19 (6) | 12 (4)  |
| Abdominal pain   | 19 (6) | 12 (4)  |
| Neutropenia      | 2 (<1) | 32 (11) |

\*Adverse events were graded according to the National Cancer Institute Common Toxicity Criteria for Adverse Events (NCI-CTCAE), version 4.0.

¶One patient randomized to dacarbazine was treated in error with vemurafenib and is included in the vemurafenib cohort for the purposes of toxicity assessment.

Supplementary Figure. Disposition of patients accrued to BRIM3.

Disposition of 2107 patients screened on BRIM3. \* Among the 1432 screen failures, data are available on 519 patients as to the reason for screen failure. These were: BRAF<sup>V600E</sup> mutation not detected (413), brain metastases discovered (50), other inclusion/exclusion criteria not met (36), no tumor tissue available for BRAF testing (7), patient withdrew consent (7), deteriorating performance status or death (6). Because of resource allocation issues, data collection procedures were changed to minimize the amount of data collected on screen failure patients. Therefore, for 913 screen failure patients, the reason for screen failure was coded by the investigator as “not specified”.

‡Pulmonary embolism (1 patient), not eligible (1 patient), clinical deterioration (1 patient), brain metastasis (2 patients), not known (2 patients).

N = 2107 Patients screened

N = 675  
Patients randomized

N = 1432\*  
Screening failures

N = 337  
vemurafenib

N = 338  
dacarbazine

N = 335  
treated

N = 2  
not treated

N = 289  
treated

N = 49  
not treated

- Patient did not start treatment because of low hemoglobin at baseline (N = 1)
- Patient with no BRAF mutation was randomized in error (N = 1)

- Withdrawal of consent (N = 20)
- Refused Treatment (N = 17)
- Other † (N = 7)
- Progression (N = 3)
- No measurable tumor (N = 1)
- Received vemurafenib instead of dacarbazine (N = 1)
